# Supplementary material for: Lack of Evidence for the Role of the p.(Ser96Ala) Polymorphism in Histidine-Rich Calcium Binding Protein as a Secondary Hit in Cardiomyopathies
Source: Int J Mol Sci. 2023 Nov 3;24(21):15931. doi: 10.3390/ijms242115931 (PMC10648441; doi:10.3390/ijms242115931)
Supplement: Supplementary file 1 [file ijms-24-15931-s001.zip › Table S1.pdf]

## Supplementary Materials

**Table S1.** Logistic regression analysis in *PLN* p.(Arg14del) index or relatives were modelled with *HRC* Ser96Ala as predictor. Analyses were adjusted for sex, age at enrollment and principal components. *PLN*; phospholamban, CI; confidence interval, VA; ventricular arrhythmia.

| <i>PLN</i> p.(Arg14del)          | Odds ratio | 95% CI        | <i>p</i> -value |
|----------------------------------|------------|---------------|-----------------|
| <b>Index-only</b>                |            |               |                 |
| <b>Life-threatening VA event</b> | 0.554      | 0.300 – 0.985 | 0.049*          |
| <b>HF event</b>                  | 0.887      | 0.509 – 1.535 | 0.667           |
| <b>Composite</b>                 | 0.655      | 0.376 – 1.120 | 0.126           |
| <b>Relative-only</b>             |            |               |                 |
| <b>Life-threatening VA event</b> | 0.994      | 0.627 – 1.561 | 0.981           |
| <b>HF event</b>                  | 0.885      | 0.480 – 1.606 | 0.690           |
| <b>Composite</b>                 | 1.024      | 0.681 – 1.528 | 0.908           |

\*after correction for multiple testing, this statistical analysis was not sustained.

**Table S1a. Time-to-event analyses in *PLN* p.Arg14del carriers.** PLN; phospholamban, PC; principal component, CI; confidence interval, Ser; serine, Ala; alanine, VT; ventricular tachycardia, HF; heart failure.

| <i>PLN</i><br><i>p.(Arg14del)</i>                            | Adjusted for sex, age at enrollment and PC |                |              |                        |                 |
|--------------------------------------------------------------|--------------------------------------------|----------------|--------------|------------------------|-----------------|
|                                                              | Estimate                                   | Standard error | Hazard ratio | 95% CI of Hazard ratio | <i>p</i> -value |
| <b>Genetic variant<br/>Ser96Ala T &gt; G</b>                 |                                            |                |              |                        |                 |
| Incident death<br>(all cause mortality)<br>(from birth)      | -0.127                                     | 0.188          | 0.880        | [0.609 – 1.273]        | 0.499           |
| Incident death<br>(all cause mortality)<br>(from enrollment) | -0.176                                     | 0.183          | 0.839        | [0.5856– 1.202]        | 0.338           |
| Incident VT/VF<br>(from birth)                               | -0.206                                     | 0.139          | 0.814        | [0.620 – 1.068]        | 0.137           |
| Incident VT /VF (from enrollment)                            | -0.209                                     | 0.137          | 0.812        | [0.621 – 1.061]        | 0.126           |
| Incident HF<br>(from birth)                                  | -0.134                                     | 0.151          | 0.874        | [0.651 – 1.174]        | 0.373           |
| Incident HF<br>(from enrollment)                             | -0.111                                     | 0.148          | 0.895        | [0.670 – 1.196]        | 0.453           |
| Incident composite<br>(from birth)                           | -0.130                                     | 0.116          | 0.878        | [0.700 – 1.103]        | 0.264           |
| Incident composite<br>(from enrollment)                      | -0.136                                     | 0.114          | 0.873        | [0.698 – 1.093]        | 0.236           |

**Table S1b. Time-to-event analyses in the DCM cohort.** DCM; dilated cardiomyopathy, PC; principal component, CI; confidence interval, Ser; serine, Ala; alanine, VT; ventricular tachycardia, SCA; sudden cardiac arrest, ICD; implantable cardioverter defibrillator.

| <i>DCM</i>                                   | Adjusted for sex, age at enrollment, genotype array and PC |                |              |                        |                 |
|----------------------------------------------|------------------------------------------------------------|----------------|--------------|------------------------|-----------------|
|                                              | Estimate                                                   | Standard error | Hazard ratio | 95% CI of Hazard ratio | <i>p</i> -value |
| <b>Genetic variant<br/>Ser96Ala T &gt; G</b> |                                                            |                |              |                        |                 |
| Incident death<br>(from enrollment)          | 0.131                                                      | 0.097          | 1.140        | [0.94 – 1.38]          | 0.172           |
| Incident death<br>(from DCM diagnosis)       | 0.131                                                      | 0.097          | 1.140        | [0.94 – 1.38]          | 0.176           |
| Incident VT<br>(from enrollment)             | -0.086                                                     | 0.141          | 0.918        | [0.70 – 1.21]          | 0.543           |
| Incident VT<br>(from DCM diagnosis)          | -0.092                                                     | 0.141          | 0.912        | [0.69 – 1.20]          | 0.516           |
| Incident SCA<br>(from enrollment)            | 0.141                                                      | 0.222          | 1.152        | [0.75 – 1.78]          | 0.525           |
| Incident SCA (from<br>DCM diagnosis)         | 0.123                                                      | 0.221          | 1.131        | [0.73 – 1.74]          | 0.579           |
| ICD implantation<br>(from enrollment)        | -0.054                                                     | 0.099          | 0.947        | [0.78 – 1.15]          | 0.585           |
| ICD implantation<br>(from DCM diagnosis)     | -0.061                                                     | 0.099          | 0.941        | [0.77 – 1.14]          | 0.541           |
