# Supplementary material for: Lack of Evidence for the Role of the p.(Ser96Ala) Polymorphism in Histidine-Rich Calcium Binding Protein as a Secondary Hit in Cardiomyopathies
Source: Int J Mol Sci. 2023 Nov 3;24(21):15931. doi: 10.3390/ijms242115931 (PMC10648441; doi:10.3390/ijms242115931)
Supplement: Supplementary file 1 [file ijms-24-15931-s001.zip › Table S2.pdf]

**Table S2**

**Table S2.** Time-to-event analyses in *PLN* p.Arg14del carriers were modelled with *HRC* Ser96Ala as predictor. Analyses were adjusted for sex, age at enrollment and principal components. *PLN*; phospholamban, CI; confidence interval, VA; ventricular arrhythmia, HF; heart failure.

| <i>PLN p.(Arg14del)</i>                                               | Hazard ratio | 95% CI of Hazard ratio | p-value |
|-----------------------------------------------------------------------|--------------|------------------------|---------|
| <b>Incident death<br/>(all cause mortality)<br/>(from birth)</b>      | 0.880        | [0.609 – 1.273]        | 0.499   |
| <b>Incident death<br/>(all cause mortality)<br/>(from enrollment)</b> | 0.839        | [0.5856– 1.202]        | 0.338   |
| <b>Incident life-threatening VA<br/>(from birth)</b>                  | 0.814        | [0.620 – 1.068]        | 0.137   |
| <b>Incident life-threatening VA<br/>(from enrollment)</b>             | 0.812        | [0.621 – 1.061]        | 0.126   |
| <b>Incident HF<br/>(from birth)</b>                                   | 0.874        | [0.651 – 1.174]        | 0.373   |
| <b>Incident HF<br/>(from enrollment)</b>                              | 0.895        | [0.670 – 1.196]        | 0.453   |
| <b>Incident composite<br/>(from birth)</b>                            | 0.878        | [0.700 – 1.103]        | 0.264   |
| <b>Incident composite<br/>(from enrollment)</b>                       | 0.873        | [0.698 – 1.093]        | 0.236   |
