# Supplementary material for: Lack of Evidence for the Role of the p.(Ser96Ala) Polymorphism in Histidine-Rich Calcium Binding Protein as a Secondary Hit in Cardiomyopathies
Source: Int J Mol Sci. 2023 Nov 3;24(21):15931. doi: 10.3390/ijms242115931 (PMC10648441; doi:10.3390/ijms242115931)
Supplement: Supplementary file 1 [file ijms-24-15931-s001.zip › Table S3.pdf]

**Table S3**

**Table S3.** Time-to-event analyses in DCM patients were modelled with *HRC* Ser96Ala as predictor. DCM; dilated cardiomyopathy, CI; confidence interval, VT; ventricular tachycardia, SCD; sudden cardiac death, ICD; implantable cardioverter defibrillator.

| <i>DCM</i>                               | Hazard ratio | 95% CI of Hazard ratio | p-value |
|------------------------------------------|--------------|------------------------|---------|
| Incident death<br>(from enrollment)      | 1.140        | [0.94 – 1.38]          | 0.172   |
| Incident death<br>(from DCM diagnosis)   | 1.140        | [0.94 – 1.38]          | 0.176   |
| Incident VT<br>(from enrollment)         | 0.918        | [0.70 – 1.21]          | 0.543   |
| Incident VT<br>(from DCM diagnosis)      | 0.912        | [0.69 – 1.20]          | 0.516   |
| Incident SCD<br>(from enrollment)        | 1.152        | [0.75 – 1.78]          | 0.525   |
| Incident SCD<br>(from DCM diagnosis)     | 1.131        | [0.73 – 1.74]          | 0.579   |
| ICD implantation<br>(from enrollment)    | 0.947        | [0.78 – 1.15]          | 0.585   |
| ICD implantation<br>(from DCM diagnosis) | 0.941        | [0.77 – 1.14]          | 0.541   |
